# Supplementary material for: Csk-homologous kinase (Chk) is an efficient inhibitor of Src-family kinases but a poor catalyst of phosphorylation of their C-terminal regulatory tyrosine
Source: PubMed Central journal article supplement (PMC5547543; doi:10.1186/s12964-017-0186-x), 2017-08-07
Supplement: 12964_2017_186_MOESM8_ESM.pdf [file 12964_2017_186_MOESM8_ESM.pdf]

| Csk concentration (μM)             | Hck(2PA-YEEI) MW | Csk MW             | Immobilised Hck(2PA-YEEI) (RU) | Analyte (Csk) Response             | Molecular Binding Activity (analytes per immobilised ligands) |
|------------------------------------|------------------|--------------------|--------------------------------|------------------------------------|---------------------------------------------------------------|
| 10.8                               | 52356.75         | 50704.43           | 6199                           | 20                                 | 0.017                                                         |
| 5.4                                | 52356.75         | 50704.43           | 6199                           | 15.1                               | 0.014                                                         |
| 2.7                                | 52356.75         | 50704.43           | 6199                           | 10.5                               | 0.01                                                          |
| 1.35                               | 52356.75         | 50704.43           | 6199                           | 6.5                                | 0.007                                                         |
| Csk-Chk chimera concentration (μM) | Hck(2PA-YEEI) MW | Csk-Chk chimera MW | Immobilised Hck(2PA-YEEI) (RU) | Analyte (Csk/Chk chimera) response | Molecular Binding Activity (analytes per immobilised ligands) |
| 14.45                              | 52356.75         | 53913.87           | 6199                           | 557                                | 0.087                                                         |
| 7.23                               | 52356.75         | 53913.87           | 6199                           | 301                                | 0.047                                                         |
| 3.61                               | 52356.75         | 53913.87           | 6199                           | 184                                | 0.029                                                         |
| 1.81                               | 52356.75         | 53913.87           | 6199                           | 150                                | 0.023                                                         |
| 0.9                                | 52356.75         | 53913.87           | 6199                           | 80                                 | 0.013                                                         |

**Table S1 Determination of the molecular binding activity of Chk, Csk and Csk-Chk Chimera to immobilized Hck(2PA-YEEI) by surface plasmon spectroscopy**

Hck(2PA-YEEI) was immobilized on the pre-activated sensor chip to give 6199 response unit (RU). Chk and Csk of the designated concentrations were used as the analytes for measurement of their binding to the immobilized Hck(2PA-YEEI). The amount of Csk or Chk bound to the immobilized Hck(2PA-YEEI) was expressed as response units (see columns labelled “Analyte (Chk) Response” and “Analyte (Csk) Response”). The molecular binding activity, which is a measure of the amount of analyte molecule bound per molecule of Hck(2PA-YEEI) immobilized on the sensor chip is calculated by the following formula:

$$\text{Molecular Binding Activity} = \frac{[\text{Analyte (Csk or Chk) response}] \times [\text{Ligand (Hck(2PA-YEEI) M.W.)}]}{[\text{Amount of immobilized ligand (Hck(2PA-YEEI))}] \times (\text{Analyte (Csk or Chk) M.W.)}$$

From the binding sensorgrams of Chk, Csk and Csk-Chk chimera bound to the immobilized Hck(2PA-YEEI) (Figures 4C, 4D and 5C), the kinetic parameters of interaction of Chk and Csk with Hck(2PA-YEEI) were determined and presented in Figures 4E and 5D.
