# Supplementary material for: Csk-homologous kinase (Chk) is an efficient inhibitor of Src-family kinases but a poor catalyst of phosphorylation of their C-terminal regulatory tyrosine
Source: PubMed Central journal article supplement (PMC5547543; doi:10.1186/s12964-017-0186-x), 2017-08-07
Supplement: 12964_2017_186_MOESM14_ESM.pdf [file 12964_2017_186_MOESM14_ESM.pdf]

| Sequence in Protein     | Positions in human Src | Modifications           | XCorr Sequest HT | Percolator q-Value Sequest HT | Percolator PEP Sequest HT |
|-------------------------|------------------------|-------------------------|------------------|-------------------------------|---------------------------|
| [R] LLLNAENPR [G]       | [170-178]              |                         | 2.28             | 0.000192                      | 0.00773                   |
| [R] AANILVGENLVCK [V]   | [398-410]              | 1×Carbamidomethyl [C12] | 2.35             | 0.000192                      | 0.00416                   |
| [K] VADFGLAR [L]        | [411-418]              |                         | 1.91             | 0.000672                      | 0.0235                    |
| [R] TQFNSLQQLVAYYSK [H] | [227-241]              |                         | 3.2              | 0.000672                      | 0.0146                    |

**Table S2 Identification of tryptic fragments derived from Src co-immunoprecipitated with Chk-GFP from the DLD-1-Chk-GFP cell lysate**

Proteins immunoprecipitated from lysate of the DLD-1-Chk-GFP cells and that of the DLD-1-GFP cells (Control) were processed and digested with trypsin as described previously by Ang and Nice [56]. The tryptic fragments were analysed by LC-MS/MS as described in the experimental procedures. The SRC peptides identified by LC MS/MS and using the SEQUEST search engine are listed. A total of 4 different peptides were identified with high confidence at 1% FDR. The identify of these peptides were further validated with the Percolator algorithm for discrimination between correct and incorrect spectrum identifications as described by Kall, *et al* [84]. These fragments were not detected in the anti-GFP immunoprecipitate of the DLD-1-GFP cell lysate (Control lysate), suggesting that Src was specifically bound to Chk-GFP in the DLD-1-Chk-GFP cells.
